# Supplementary material for: Waste to white light: a sustainable method for converting biohazardous waste to broadband white LEDs
Source: Royal Society of Chemistry journal article supplement (doi:10.1039/d2ra01146h), 2022-01-01
Supplement: d2ra01146h1.pdf [file d2ra01146h1.pdf]

### Supplementary data

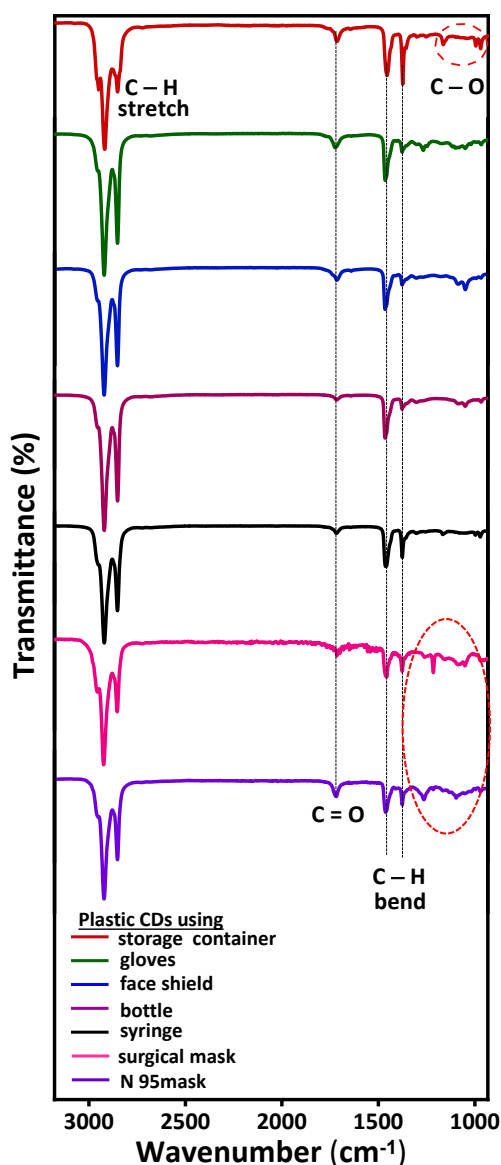

Figure S1: Showing Fourier transform infrared spectrum (FTIR) spectra of plastic CDs. Absorption peak at  $1716 \text{ cm}^{-1}$  correspond to C = O stretching vibrations. Absorption bands at  $1202 \text{ cm}^{-1}$  and  $995 \text{ cm}^{-1}$  correspond to C – O stretching vibrations. Peaks at  $1454 \text{ cm}^{-1}$  and  $1376 \text{ cm}^{-1}$  correspond to C – H bending modes and C = C stretching modes respectively. Bands at  $2951 \text{ cm}^{-1}$ ,  $2918 \text{ cm}^{-1}$  and  $2852 \text{ cm}^{-1}$  correspond to C – H stretching vibrations. Increase in absorption bands between  $1000 \text{ cm}^{-1}$  to  $1400 \text{ cm}^{-1}$  observed in FTIR spectra of CDs from surgical mask and N 95 mask compared to that of CDs made of other plastic waste. These peaks could be related to surface groups on CD surface that supports presence of multiple peaks in emission spectra of CDs made from surgical mask and N95 face mask.

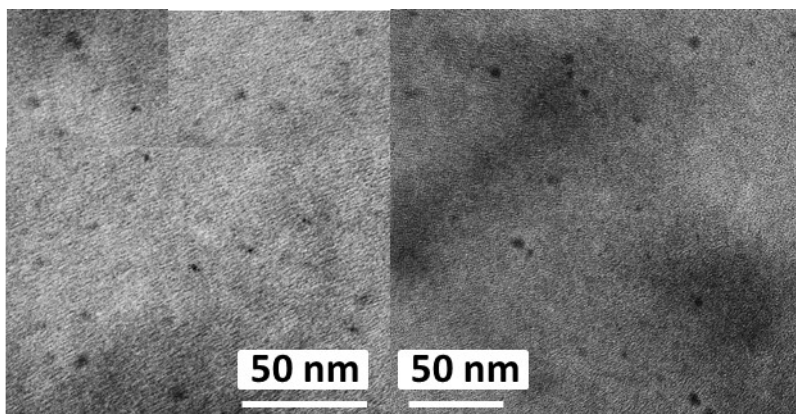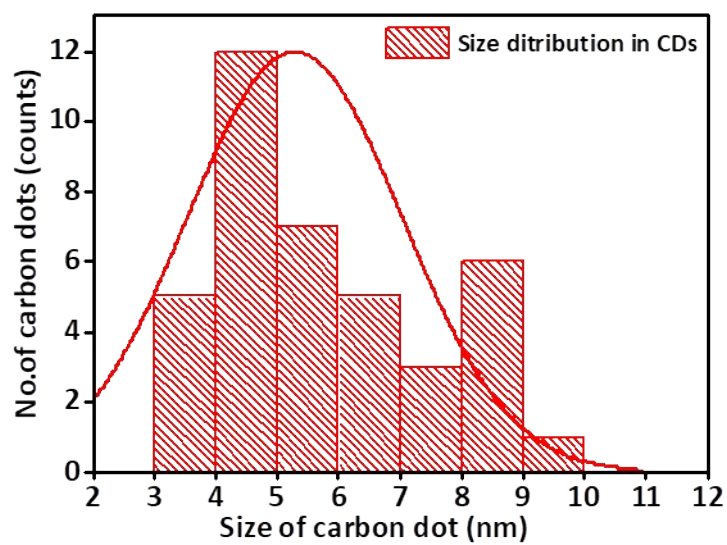

Supplementary figure 2: TEM image showing spherical nano particle formation in synthesized CDs with average particle size distribution of  $\sim 5$ nm.
